# Supplementary material for: Stable flow-induced expression of KLK10 inhibits endothelial inflammation and atherosclerosis
Source: eLife journal article supplement (doi:10.7554/elife.72579), 2022-01-11
Supplement: supp [file elife_poa_e72579_Figure_1_figure_supplement_2.docx]

**PECAM1**

**Figure 1- Figure Supplement 2. scATACseq analysis of *Klk10* and *Pecam1* from the PCL mouse model.** The plots display single cell chromatin accessibility status of (a) *Klk10* and (b) *CD31* (*Pecam1*) genes in 8 endothelial cell clusters (E1-E8), smooth muscle cells (SMCs), fibroblasts (Fibro), 4 monocytes/macrophages clusters (Mo1-4), dendritic cells (DC), and T cells (T) in the mouse carotid arteries following 2 days or 2 weeks of the PCL surgery as we recently reported38. The published scATACseq data38 were re-analyzed here for *Klk10* and *Pecam1* genes. E1–E4 clusters represent ECs exposed to *s-flow* conditions in the RCA. E5 and E7 clusters represent ECs exposed to acute (2 days) *d-flow* in the LCA*.* E6 and E8 clusters represent ECs exposed to chronic (2 weeks) *d-flow* in the LCA*.*


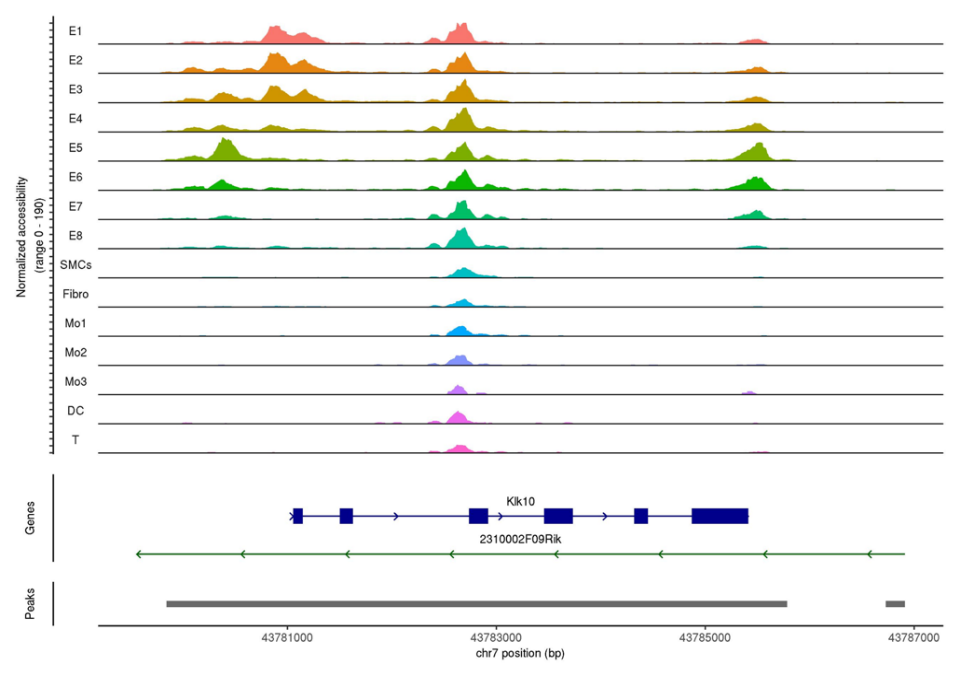


*Klk10*

**a**


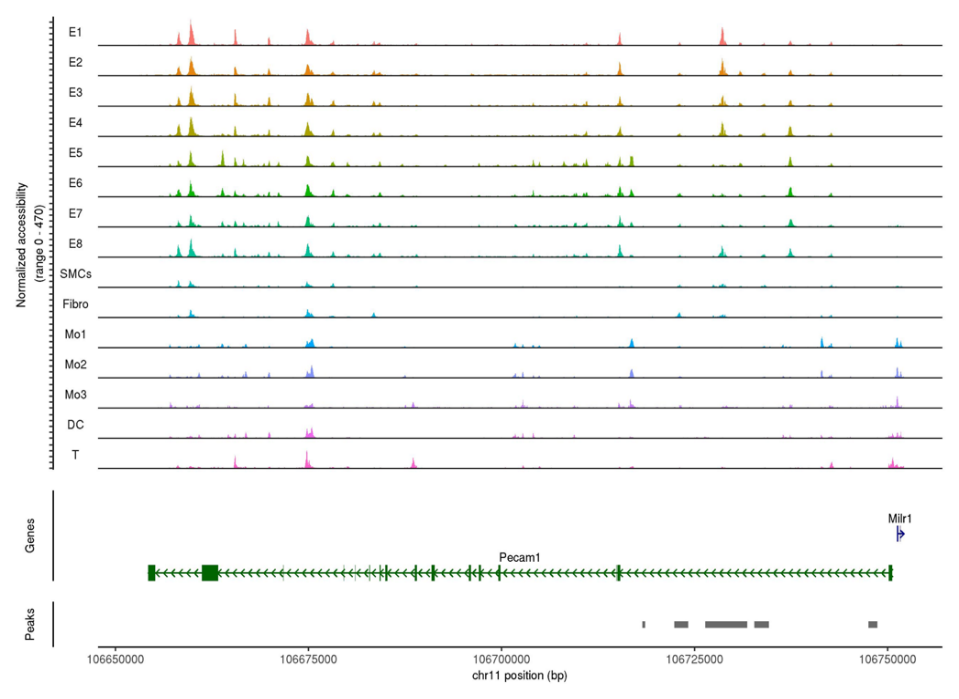


*Pecam1*

**b**
