# Supplementary material for: Stable flow-induced expression of KLK10 inhibits endothelial inflammation and atherosclerosis
Source: eLife journal article supplement (doi:10.7554/elife.72579), 2022-01-11
Supplement: supp [file elife_poa_e72579_Figure_2_figure_supplement_1.docx]

**d**

**c**

**b**

**a**

**
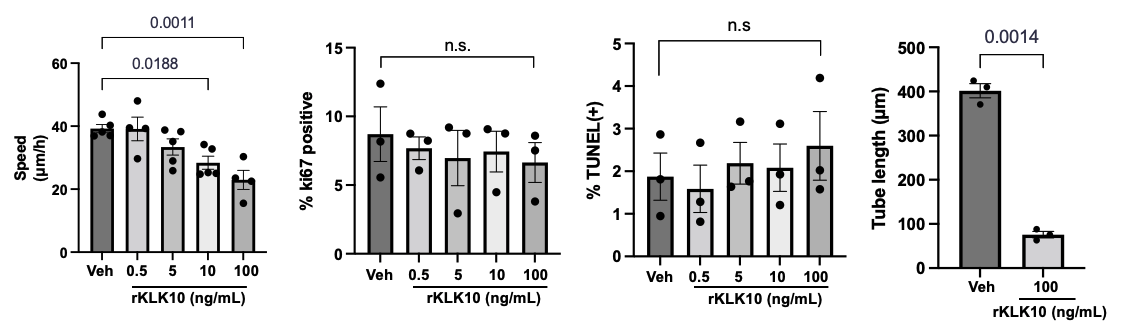
**

**Figure 2- Figure Supplement 1. KLK10 inhibits endothelial migration and tube formation, but not apoptosis or proliferation.** Human umbilical vein endothelial cells (HUVECs) were treated with rKLK10from 0.5-100 ng/mL and (a) the scratch assay was performed to measure the rate at which endothelial cells migrated across the scratch; (b) apoptosis was assessed by TUNEL staining; (c) proliferation was assayed by ki67 imunnostaining. (d) HUEVCs were grown on Matrigel and treated with rKLK10 at 100 ng/mL or vehicle and tube length was measured in ImageJ. N=3-5. One-way ANOVA with Bonferroni correction for multiple comparisons where appropriate (a-c) or paired two-tailed t-test (d). Mean±SEM.
