# Supplementary material for: Stable flow-induced expression of KLK10 inhibits endothelial inflammation and atherosclerosis
Source: eLife journal article supplement (doi:10.7554/elife.72579), 2022-01-11
Supplement: supp [file elife_poa_e72579_Figure_2_figure_supplement_2.docx]

**a**

**c**

**b**

**
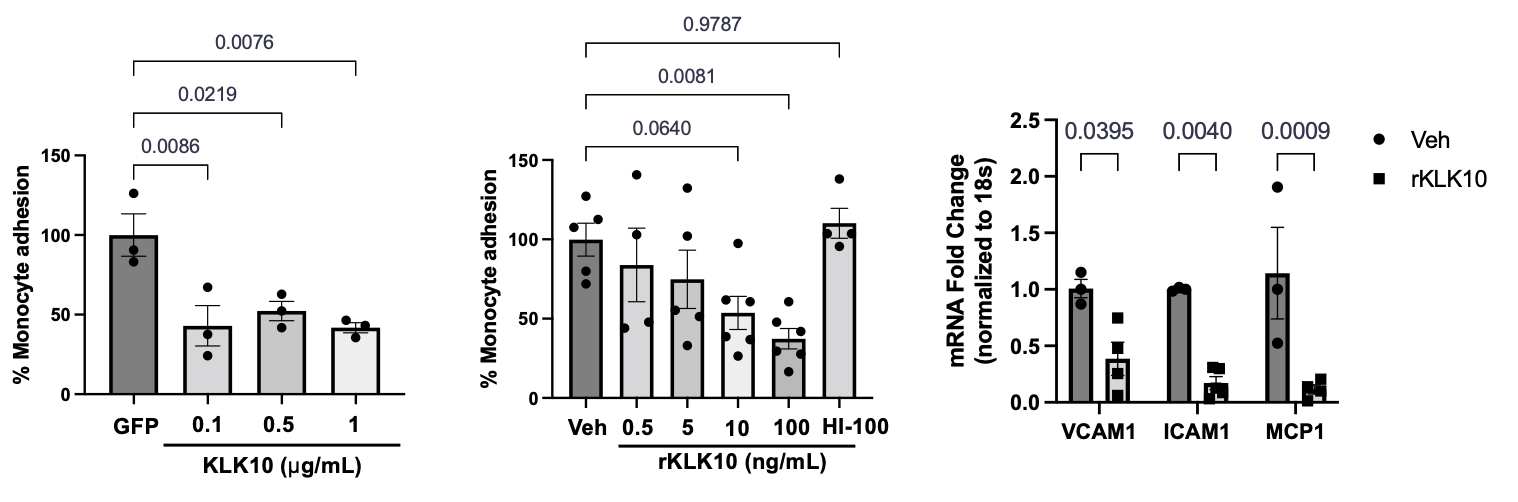
**

**Figure 2- Figure Supplement 2. KLK10 reduces inflammation in endothelial cell.** (a) Human aortic endothelial cells (HAECs) were transfected with *KLK10* plasmid ranging from 0.1-1 μg/mL or 1 μg/mL GFP plasmid for 24 hr and the THP1 monocyte adhesion assay was performed. N=3 (b) HAECs were treated with 0.5 to 100 ng/mL rKLK10 and monocyte adhesion assay was performed. N=4-6. (c) HAECs were treated with 100 ng/mL rKLK10 for 24h and qPCR was performed to assess mRNA expression of *VCAM1*, *ICAM1*, and *MCP1*. N=3-5. One-way ANOVA with Bonferroni correction for multiple comparisons (a,b) or two-way ANOVA with Bonferroni correction for multiple comparisons (c). Mean±SEM.
