# Supplementary material for: Stable flow-induced expression of KLK10 inhibits endothelial inflammation and atherosclerosis
Source: eLife journal article supplement (doi:10.7554/elife.72579), 2022-01-11
Supplement: supp [file elife_poa_e72579_Figure_2_figure_supplement_3.docx]

**a**

**b**

***ICAM1***

***VCAM1***

**
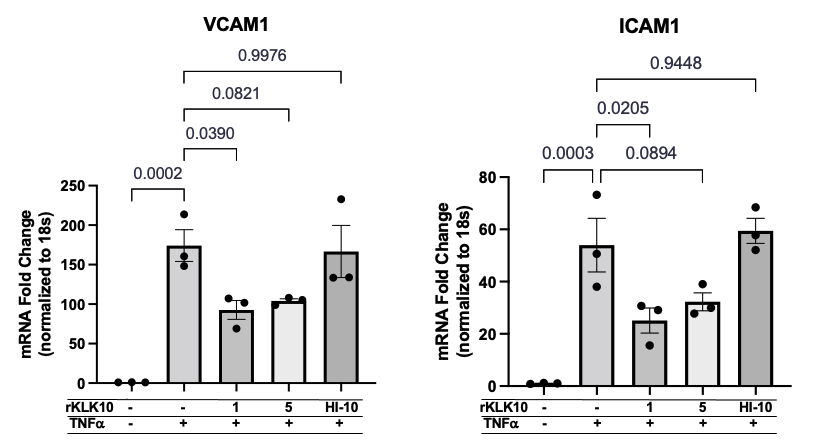
**

**Figure 2- Figure Supplement 3. Heat-inactivation of rKLK10 prevents its anti-inflammatory effects on VCAM1 and ICAM1 expression.**(a,b) HAECs were treated with TNFα (5 ng/mL) for 4h followed by 1 ng/mL, 10 ng/mL, or 10 ng/mL heat-inactivated (HI) rKLK10 overnight and mRNA expression of (a) *Vcam1* and (b) *Icam1* mRNA was measured by qPCR. n=3. One-way ANOVA with Bonferroni correction for multiple comparisons. Mean±SEM. *P≤0.05.
