# Supplementary material for: Stable flow-induced expression of KLK10 inhibits endothelial inflammation and atherosclerosis
Source: eLife journal article supplement (doi:10.7554/elife.72579), 2022-01-11
Supplement: supp [file elife_poa_e72579_Figure_2_figure_supplement_5.docx]

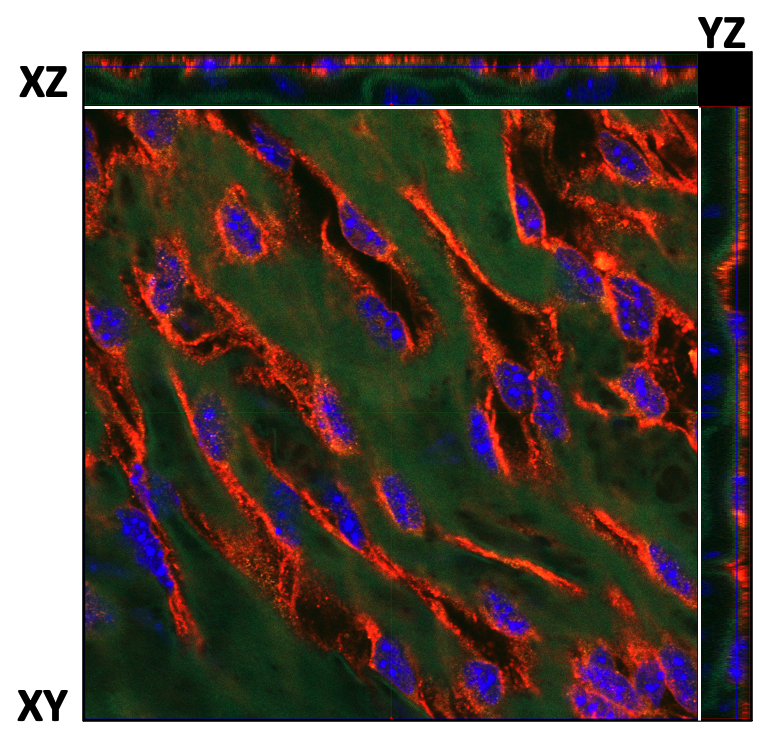


**Figure 2- Figure Supplement 5. Orthogonal projection of VCAM1 *en face* immunostaining and quantification.** *En face* immunostaining for VCAM1 (shown in Figure 2j) was imaged by confocal microscopy. Shown is a Z-section image demonstrating VCAM1 expression (red) at the endothelial layer above the internal elastic lamina (green). Blue is DAPI. XYZ referes to an optical plane in the confocal image.
