# Supplementary material for: Stable flow-induced expression of KLK10 inhibits endothelial inflammation and atherosclerosis
Source: eLife journal article supplement (doi:10.7554/elife.72579), 2022-01-11
Supplement: supp [file elife_poa_e72579_Figure_2_figure_supplement_6.docx]

**a**

**b**

**
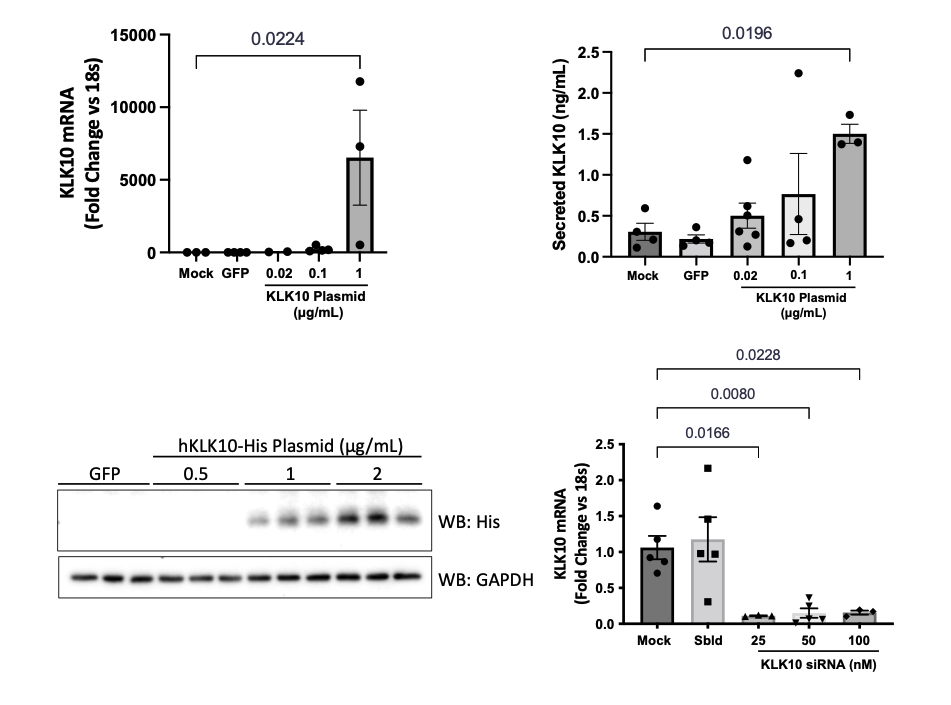
**

**c**

**d**

**
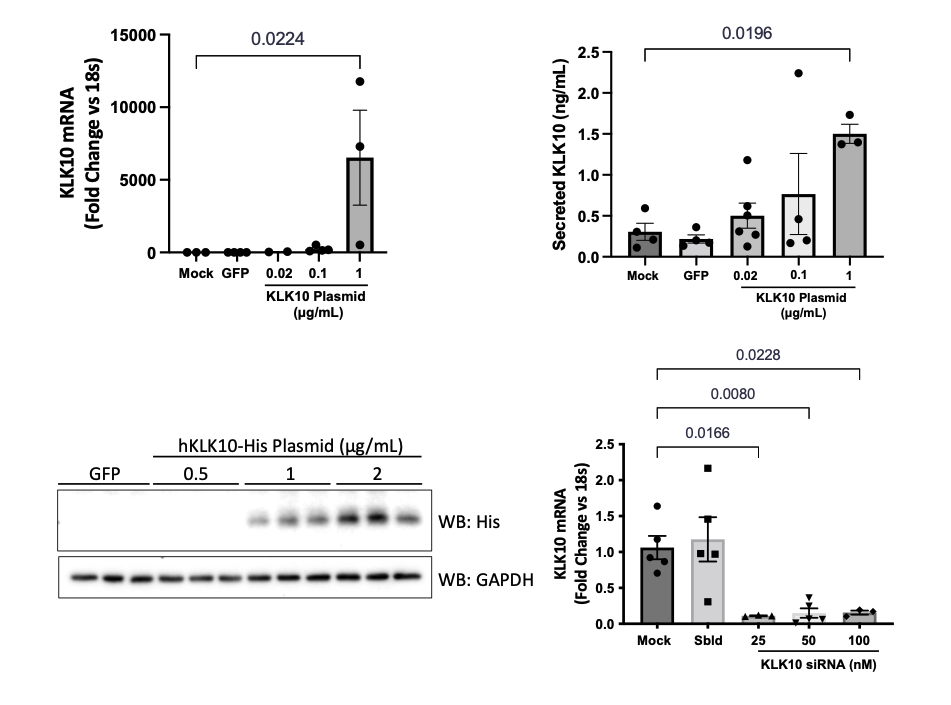
**

**Figure 2- Figure Supplement 6. *KLK10* plasmid and *KLK10* siRNA overexpress and knockdown KLK10, respectively.** (a) Human Aortic Endothelial Cells (HAECs) were transfected with 0.02-1 μg/mL *KLK10* plasmid or 1 μg/mL GFP plasmid and *KLK10* mRNA expression was measured by qPCR. N=3-4. (b) HAECs were transfected with 0.02-1 μg/mL *KLK10* plasmid or 1 μg/mL GFP plasmid and KLK10 secretion into the media was measured by ELISA. N=3-5. (c) HAECs were transfected with 0.5-2 μg/mL *KLK10* plasmid or 2 μg/mL GFP and KLK10 protein expression was measured by western blot, using GAPDH as an internal control. N=3. Figure 2- Figure Supplement 6- Source data 1. (d) HAECs were transfected with 25-100 nM *KLK10* siRNA or 100nM scrambled siRNA and *KLK10* mRNA expression was measured by qPCR. N=3-5. Mean±SEM. One-way ANOVA with Bonferroni correction for multiple comparisons where appropriate.
