# Supplementary material for: Stable flow-induced expression of KLK10 inhibits endothelial inflammation and atherosclerosis
Source: eLife journal article supplement (doi:10.7554/elife.72579), 2022-01-11
Supplement: supp [file elife_poa_e72579_Figure_2_figure_supplement_7.docx]

**
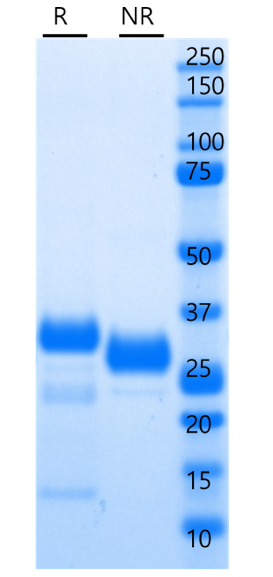
**

**Figure 2- Figure Supplement 7. Human rKLK10 purification from CHO cells.** Human rKLK10 with His-tag overexpressed in CHO cells was purified by affinity chromotagraphy. Purified rKLK10 (5 ug) was resolved by SDS-PAGE under reducing (R) or non-reducing (NR) conditions and stained with Coomasie blue. Methods- Figure Supplement 1- Source Data 1.
