# Supplementary material for: Stable flow-induced expression of KLK10 inhibits endothelial inflammation and atherosclerosis
Source: eLife journal article supplement (doi:10.7554/elife.72579), 2022-01-11
Supplement: supp [file elife_poa_e72579_Figure_6_figure_supplement_1.docx]

**Figure 6- Figure Supplement 1. KLK10 level in the mouse plasma.** KLK10 expression was measured in the plasma from mice overexpressing luciferase (Ctrl) or mouse *Klk10* plasmid with ultrasound treatment in the hind limb as described in Figure 6. Plasma KLK10 level was determined using mouse KLK10 ELISA (BG-MUS11429). Paired two-tailed t-test was used. Shown are mean+SEM, n=5.
