# Supplementary material for: Stable flow-induced expression of KLK10 inhibits endothelial inflammation and atherosclerosis
Source: eLife journal article supplement (doi:10.7554/elife.72579), 2022-01-11
Supplement: supp [file elife_poa_e72579_Figure_8_figure_supplement_2.docx]

**
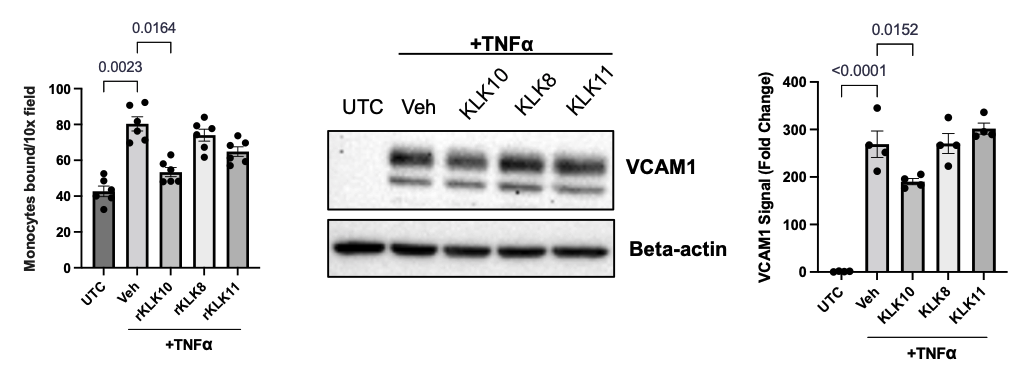
**

**c**

**b**

**a**

**Figure 8- Figure Supplement 2. rKLK10, but not rKLK8 or rKLK11, inhibits monocyte adhesion and VCAM1 expression in HAECs exposed to TNF.** HAECs were treated with rKLK8, 10, or 11 (10 ng/ml each) or vehicle (UTC) for 16 hours, followed by TNF (5 ng/ml) or vehicle for 4 hours. Then, a) THP1 monocyte adhesion assay and b) western blot analysis for VCAM1 expression were performed. C) is the quantification of b) using beta-actin as an internal control using the NIH Image J. Figure 8- Figure Supplement 2- Source data 1. One-way Anova was used for statistical analysis. Shown are Mean+SEM, n=4-6.
